# Supplementary material for: Multiple Antibiotic Resistance (MAR), Plasmid Profiles, and DNA Polymorphisms among Vibrio vulnificus Isolates
Source: PubMed Central journal article supplement (PMC6627359; doi:10.3390/antibiotics8020068), 2019-05-28
Supplement: antibiotics-08-00068-s001.pdf [file antibiotics-08-00068-s001.pdf]

**Table S1.** Antibiotic resistance among *Vibrio vulnificus* isolates.

| Isolate No. | Antibiotic Pattern <sup>a</sup> | Amp* | B*  | Cpf | Da  | E   | K   | Kf  | Nv  | P   | S   | T   | Va  | MR |
|-------------|---------------------------------|------|-----|-----|-----|-----|-----|-----|-----|-----|-----|-----|-----|----|
| 1           | BDaEKfNvPVa                     | 1.3  | -   | 1.7 | -   | -   | 2   | -   | -   | -   | 1.6 | 2.2 | -   | 7  |
| 2           | BDaEKfNvPVa                     | 1.2  | -   | 2   | -   | -   | 2.2 | -   | -   | -   | 1.8 | 2.3 | -   | 7  |
| 3           | AmpDaEKfNvP                     | -    | 1.2 | 1.5 | -   | -   | 1.7 | -   | -   | -   | 1.5 | 1.3 | 1.2 | 6  |
| 4           | BDaEKfNvPVa                     | 1    | -   | 2   | -   | -   | 2.5 | -   | -   | -   | 1.8 | 2.5 | -   | 7  |
| 5           | AmpKfP                          | -    | 1.3 | 2.2 | 2   | 2   | 2   | -   | 2.2 | -   | 2   | 2   | 1.5 | 3  |
| 6           | AmpBDaEKfNvPVa                  | -    | -   | 1.8 | -   | -   | 2.5 | -   | -   | -   | 2   | 1.5 | -   | 8  |
| 7           | BDaKfNvPVa                      | 2    | -   | 2.2 | -   | 1.8 | 2.8 | -   | -   | -   | 1.6 | 2.1 | -   | 6  |
| 8           | BDaKfNvPVa                      | 1.3  | -   | 1.8 | -   | 1.8 | 2.5 | -   | -   | -   | 1.8 | 2.5 | -   | 6  |
| 9           | AmpBDaKfNvPVa                   | -    | -   | 2.5 | -   | 2   | 2   | -   | -   | -   | 2   | 2.6 | -   | 7  |
| 10          | AmpKfP                          | -    | 1.5 | 2.3 | 2   | 3   | 1.8 | -   | 2   | -   | 2   | 2   | 1.8 | 3  |
| 11          | AmpKfP                          | -    | 2.1 | 1.6 | 2   | 2   | 1.3 | -   | 1.2 | -   | 1.2 | 2   | 1.8 | 3  |
| 12          | PVa                             | 1.3  | 1.8 | 2.8 | 2.5 | 2.2 | 2.2 | 1.6 | 2.5 | -   | 2   | 2.3 | -   | 2  |
| 13          | AmpBDaEKfNvPVa                  | -    | -   | 1.8 | -   | -   | 2.5 | -   | -   | -   | 1.5 | 2   | -   | 8  |
| 14          | AmpBDaEKfNvPVa                  | -    | -   | 2.5 | -   | -   | 3   | -   | -   | -   | 2   | 2.5 | -   | 8  |
| 15          | AmpDaEKfNvP                     | -    | 1.7 | 2   | -   | -   | 2.5 | -   | -   | -   | 1   | 2   | 1.6 | 6  |
| 16          | AmpKfP                          | -    | 1.7 | 2   | 2.1 | 3.2 | 1.8 | -   | 2   | -   | 2.1 | 2.3 | 2   | 3  |
| 17          | AmpKfP                          | -    | 1.3 | 1.8 | 1.8 | 3   | 1.3 | -   | 2   | -   | 1.8 | 2   | 2   | 3  |
| 18          | AmpBDaKfNvPVa                   | -    | -   | 1.5 | -   | 1.7 | 2.2 | -   | -   | -   | 1.5 | 2.5 | -   | 7  |
| 19          | AmpBDaEKfNvPVa                  | -    | -   | 2   | -   | -   | 2   | -   | -   | -   | 1.5 | 1.8 | -   | 8  |
| 20          | KfPVa                           | 1.8  | 1.3 | 2.2 | 0.8 | 2.3 | 2.5 | -   | 2   | -   | 1.4 | 2.5 | -   | 3  |
| 21          | AmpBDaKfNvPVa                   | -    | -   | 2.6 | -   | 1.7 | 3   | -   | -   | -   | 1.7 | 2.6 | -   | 7  |
| 22          | AmpBDaEKfNvPVa                  | -    | -   | 1.8 | -   | -   | 2   | -   | -   | -   | 1.1 | 2   | -   | 8  |
| 23          | AmpBDaEKfNvPVa                  | -    | -   | 2.6 | -   | -   | 2   | -   | -   | -   | 2   | 2   | -   | 8  |
| 24          | AmpPVa                          | -    | 2.3 | 2.3 | 2.3 | 3   | 2   | 1.1 | 2.2 | -   | 2   | 2.8 | -   | 3  |
| 25          | AmpKfP                          | -    | 1.5 | 2.3 | 1.8 | 1.8 | 2.2 | -   | 1   | -   | 2   | 2   | 1.5 | 3  |
| 26          | BDaEP                           | 1    | -   | 2.3 | -   | -   | 2.2 | 1.3 | 2.3 | -   | 2   | 2.2 | 1.8 | 4  |
| 27          | BDaENvPVa                       | 1.5  | -   | 2   | -   | -   | 1.8 | 2   | -   | -   | 1.8 | 2.3 | -   | 6  |
| 28          | AmpBDaE                         | -    | -   | 2.2 | -   | -   | 2   | 1.5 | 2   | 1.5 | 2   | 2.5 | 1.8 | 4  |
| 29          | AmpBDaEKfNvPVa                  | -    | -   | 2.6 | -   | -   | 2   | -   | -   | -   | 2   | 2   | -   | 8  |
| 30          | BDaEP                           | 1.2  | -   | 2.3 | -   | -   | 2.2 | 1.5 | 2.3 | -   | 1.8 | 2.2 | 1.8 | 4  |
| 31          | AmpPVa                          | -    | 2   | 2.5 | 2.3 | 3   | 2   | 1.5 | 2.2 | -   | 2   | 2.8 | -   | 3  |
| 32          | AmpDaEKfNvP                     | -    | 1.2 | 2   | -   | -   | 1.7 | -   | -   | -   | 1.5 | 2.3 | 1.5 | 6  |
| 33          | BDaENvPVa                       | 1.2  | -   | 2   | -   | -   | 2.2 | 1.5 | -   | -   | 1.8 | 2.3 | -   | 6  |
| 34          | KfVa                            | 1.5  | 2   | 2   | 1.5 | 2   | 2   | -   | 1.5 | 1.3 | 2.3 | 1.8 | -   | 2  |
| 35          | AmpBDaEPVa                      | -    | -   | 1.5 | -   | -   | 1.7 | 1.2 | 1.8 | -   | 1.5 | 1.3 | -   | 6  |
| 36          | BDaEP                           | 1    | -   | 2.3 | -   | -   | 2.2 | 1.3 | 2.3 | -   | 2   | 2.2 | 1.8 | 4  |
| 37          | AmpDaEKfNvP                     | -    | 1.2 | 1.5 | -   | -   | 1.7 | -   | -   | -   | 1.5 | 1.3 | 1.2 | 6  |
| 38          | AmpBDaEKKfNvP                   | -    | -   | 2   | -   | -   | -   | -   | -   | -   | 1.5 | 1.3 | 1.5 | 8  |
| 39          | AmpKNvPVa                       | -    | 1.2 | 1.5 | 2   | 2.2 | -   | 1.5 | -   | -   | 1.5 | 1.3 | -   | 5  |
| 40          | AmpDaEKfNvP                     | -    | 1.2 | 1.5 | -   | -   | 1.5 | -   | -   | -   | 1.5 | 1.3 | 1.2 | 6  |
| 41          | AmpDaKPVa                       | -    | 1.2 | 1.5 | -   | 2   | -   | 1.7 | 1.5 | -   | 1.5 | 1.3 | -   | 5  |
| 42          | AmpPVa                          | -    | 2.3 | 2.3 | 2.3 | 3   | 2   | 1.1 | 2.2 | -   | 2   | 2.8 | -   | 3  |
| 43          | AmpBDaEPVa                      | -    | -   | 1.5 | -   | -   | 1.7 | 1.2 | 2   | -   | 1.5 | 1.3 | -   | 6  |
| 44          | AmpPVa                          | -    | 2.3 | 2.3 | 2.3 | 3   | 2   | 1.1 | 2.2 | -   | 2   | 2.2 | -   | 3  |
| 45          | AmpBDaEPVa                      | -    | -   | 1.5 | -   | -   | 1.7 | 1.5 | 2.2 | -   | 1.5 | 1.3 | -   | 6  |
| 46          | AmpKfP                          | -    | 1.5 | 2.3 | 1.8 | 1.8 | 2.2 | -   | 1   | -   | 2   | 2   | 1.5 | 3  |
| 47          | AmpBDaKfNvPVa                   | -    | -   | 1.8 | -   | 2   | 2.5 | -   | -   | -   | 1.5 | 2   | -   | 8  |
| 48          | AmpBDaEP                        | -    | -   | 2   | -   | -   | 2.2 | 1.8 | 1.5 | -   | 1.8 | 2.2 | 1.7 | 5  |
| 49          | AmpKfP                          | -    | 1.5 | 2.3 | 1.8 | 1.8 | 2.2 | -   | 1   | -   | 2   | 2   | 1.5 | 3  |
| 50          | AmpBDaEPVa                      | -    | -   | 1.5 | -   | -   | 1.7 | 1.8 | 2   | -   | 1.5 | 1.8 | -   | 6  |
| 51          | BDaEKfNvPVa                     | 1.2  | -   | 2   | -   | -   | 2   | -   | -   | -   | 1.8 | 2   | -   | 7  |
| 52          | BDaEKfNvPVa                     | 1.5  | -   | 1.8 | -   | -   | 2.2 | -   | -   | -   | 2   | 2.3 | -   | 7  |
| 53          | BDaEKfNvPVa                     | 1.2  | -   | 2   | -   | -   | 1.8 | -   | -   | -   | 1.8 | 1.5 | -   | 7  |

| Isolate No. | Antibiotic Pattern <sup>a</sup> | Amp* | B*  | Cpf | Da  | E   | K   | Kf  | Nv  | P   | S   | T   | Va  | MR |
|-------------|---------------------------------|------|-----|-----|-----|-----|-----|-----|-----|-----|-----|-----|-----|----|
| 54          | AmpBDaEPVa                      | -    | -   | 1.5 | -   | -   | 1.7 | 1.5 | 2   | -   | 1.5 | 1.3 | -   | 6  |
| 55          | AmpBDaEPVa                      | -    | -   | 1.5 | -   | -   | 1.7 | 1.8 | 1.5 | -   | 1.5 | 1.3 | -   | 6  |
| 56          | AmpKfP                          | -    | 1.5 | 2.3 | 1.8 | 2   | 2.2 | -   | 1   | -   | 2   | 2   | 1.5 | 3  |
| 57          | AmpKfP                          | -    | 2   | 2.3 | 1.8 | 1.8 | 2.2 | -   | 1.5 | -   | 2.3 | 2   | 1.5 | 3  |
| 58          | KfVa                            | 1.5  | 2   | 2   | 1.5 | 2   | 2   | -   | 1.5 | 1.3 | 2.3 | 1.8 | -   | 2  |
| 59          | KfVa                            | 1.3  | 1.8 | 2   | 2   | 2.2 | 1.8 | -   | 1.8 | 1.3 | 2   | 1.5 | -   | 2  |
| 60          | BDaEKfNvPVa                     | 1.2  | -   | 2   | -   | -   | 2.2 | -   | -   | -   | 1.8 | 2.3 | -   | 7  |

<sup>a</sup>Tested for Ampicillin (Amp), Bacitracin (B), Cefoperazone (Cpf), Cephalothin (Kf), Clindamycin (Da), Erythromycin (E), Kanamycin(K), Novobiocin (Nv), Penicillin (P), Streptomycin (S), and Vancomycin (Va). MR- Multi resistance; - No diameter formed. Numbers- diameter in cm.

**Table S2.** Antibiotic resistance among *Vibrio vulnificus* isolates.

| Isolate No. | antibiotic pattern <sup>a</sup> | Amp | B | Cpf | Da | E | K | Kf | Nv | P | S | T | Va | MR |
|-------------|---------------------------------|-----|---|-----|----|---|---|----|----|---|---|---|----|----|
| 1           | BDaEKfNvPVa                     | S   | R | S   | R  | R | S | R  | R  | R | S | S | R  | 7  |
| 2           | BDaEKfNvPVa                     | S   | R | S   | R  | R | S | R  | R  | R | S | S | R  | 7  |
| 3           | AmpDaEKfNvP                     | R   | S | S   | R  | R | S | R  | R  | R | S | S | S  | 6  |
| 4           | BDaEKfNvPVa                     | S   | R | S   | R  | R | S | R  | R  | R | S | S | R  | 7  |
| 5           | AmpKfP                          | R   | S | S   | S  | S | S | R  | S  | R | S | S | S  | 3  |
| 6           | AmpBDaEKfNvPVa                  | R   | R | S   | R  | R | S | R  | R  | R | S | S | R  | 8  |
| 7           | BDaKfNvPVa                      | S   | R | S   | R  | S | S | R  | R  | R | S | S | R  | 6  |
| 8           | BDaKfNvPVa                      | S   | R | S   | R  | S | S | R  | R  | R | S | S | R  | 6  |
| 9           | AmpBDaKfNvPVa                   | R   | R | S   | R  | S | S | R  | R  | R | S | S | R  | 7  |
| 10          | AmpKfP                          | R   | S | S   | S  | S | S | R  | S  | R | S | S | S  | 3  |
| 11          | AmpKfP                          | R   | S | S   | S  | S | S | R  | S  | R | S | S | S  | 3  |
| 12          | PVa                             | S   | S | S   | S  | S | S | S  | S  | R | S | S | R  | 2  |
| 13          | AmpBDaEKfNvPVa                  | R   | R | S   | R  | R | S | R  | R  | R | S | S | R  | 8  |
| 14          | AmpBDaEKfNvPVa                  | R   | R | S   | R  | R | S | R  | R  | R | S | S | R  | 8  |
| 15          | AmpDaEKfNvP                     | R   | S | S   | R  | R | S | R  | R  | R | S | S | S  | 6  |
| 16          | AmpKfP                          | R   | S | S   | S  | S | S | R  | S  | R | S | S | S  | 3  |
| 17          | AmpKfP                          | R   | S | S   | S  | S | S | R  | S  | R | S | S | S  | 3  |
| 18          | AmpBDaKfNvPVa                   | R   | R | S   | R  | S | S | R  | R  | R | S | S | R  | 7  |
| 19          | AmpBDaEKfNvPVa                  | R   | R | S   | R  | R | S | R  | R  | R | S | S | R  | 8  |
| 20          | KfPVa                           | S   | S | S   | S  | S | S | R  | S  | R | S | S | R  | 3  |
| 21          | AmpBDaKfNvPVa                   | R   | R | S   | R  | S | S | R  | R  | R | S | S | R  | 7  |
| 22          | AmpBDaEKfNvPVa                  | R   | R | S   | R  | S | S | R  | R  | R | S | S | R  | 8  |
| 23          | AmpBDaEKfNvPVa                  | R   | R | S   | R  | R | S | R  | R  | R | S | S | R  | 8  |
| 24          | AmpPVa                          | R   | S | S   | S  | S | S | S  | S  | R | S | S | R  | 3  |
| 25          | AmpKfP                          | R   | S | S   | S  | S | S | R  | S  | R | S | S | S  | 3  |
| 26          | BDaEP                           | S   | R | S   | R  | R | S | S  | S  | R | S | S | S  | 4  |
| 27          | BDaENvPVa                       | S   | R | S   | R  | R | S | S  | R  | R | S | S | R  | 6  |
| 28          | AmpBDaE                         | R   | R | S   | R  | R | S | S  | S  | S | S | S | S  | 4  |
| 29          | AmpBDaEKfNvPVa                  | R   | R | S   | R  | R | S | R  | R  | R | S | S | R  | 8  |
| 30          | BDaEP                           | S   | R | S   | R  | R | S | S  | S  | R | S | S | S  | 4  |
| 31          | AmpPVa                          | R   | S | S   | S  | S | S | S  | S  | R | S | S | R  | 3  |
| 32          | AmpDaEKfNvP                     | R   | S | S   | R  | R | S | R  | R  | R | S | S | S  | 6  |
| 33          | BDaENvPVa                       | S   | R | S   | R  | R | S | S  | R  | R | S | S | R  | 6  |
| 34          | KfVa                            | S   | S | S   | S  | S | S | R  | S  | S | S | S | R  | 2  |
| 35          | AmpBDaEPVa                      | R   | R | S   | R  | R | S | S  | S  | R | S | S | R  | 6  |
| 36          | BDaEP                           | S   | R | S   | R  | R | S | S  | S  | R | S | S | S  | 4  |
| 37          | AmpDaEKfNvP                     | R   | S | S   | R  | R | S | R  | R  | R | S | S | S  | 6  |
| 38          | AmpBDaEKKfNvP                   | R   | R | S   | R  | R | R | R  | R  | R | S | S | S  | 8  |
| 39          | AmpKNvPVa                       | R   | S | S   | S  | S | R | S  | R  | R | S | S | R  | 5  |
| 40          | AmpDaEKfNvP                     | R   | S | S   | R  | S | S | R  | R  | R | S | S | S  | 6  |

| Isolate No. | antibiotic pattern <sup>a</sup> | Amp | B | Cpf | Da | E | K | Kf | Nv | P | S | T | Va | MR |
|-------------|---------------------------------|-----|---|-----|----|---|---|----|----|---|---|---|----|----|
| 41          | AmpDaKPVa                       | R   | S | S   | R  | S | R | S  | S  | R | S | S | R  | 5  |
| 42          | AmpPVa                          | R   | S | S   | S  | S | S | S  | S  | R | S | S | R  | 3  |
| 43          | AmpBDaEPVa                      | R   | R | S   | R  | R | S | S  | S  | R | S | S | R  | 6  |
| 44          | AmpPVa                          | R   | S | S   | S  | S | S | S  | S  | R | S | S | R  | 3  |
| 45          | AmpBDaEPVa                      | R   | R | S   | R  | R | S | S  | S  | R | S | S | R  | 6  |
| 46          | AmpKfP                          | R   | S | S   | S  | S | S | R  | S  | R | S | S | S  | 3  |
| 47          | AmpBDaKfNvPVa                   | R   | R | S   | R  | 2 | S | R  | R  | R | S | S | S  | 8  |
| 48          | AmpBDaEP                        | R   | R | S   | R  | R | S | S  | S  | R | S | S | S  | 5  |
| 49          | AmpKfP                          | R   | S | S   | S  | S | S | R  | S  | R | S | S | S  | 3  |
| 50          | AmpBDaEPVa                      | R   | R | S   | R  | R | S | S  | S  | R | S | S | R  | 6  |
| 51          | BDaEKfNvPVa                     | S   | R | S   | R  | R | S | R  | R  | R | S | S | R  | 7  |
| 52          | BDaEKfNvPVa                     | S   | R | S   | R  | R | S | R  | R  | R | S | S | R  | 7  |
| 53          | BDaEKfNvPVa                     | S   | R | S   | R  | R | S | R  | R  | R | S | S | R  | 7  |
| 54          | AmpBDaEPVa                      | R   | R | S   | R  | R | S | S  | S  | R | S | S | R  | 6  |
| 55          | AmpBDaEPVa                      | R   | R | S   | R  | R | S | S  | S  | R | S | S | R  | 6  |
| 56          | AmpKfP                          | R   | S | S   | S  | S | S | R  | S  | R | S | S | S  | 3  |
| 57          | AmpKfP                          | R   | S | S   | S  | S | S | R  | S  | R | S | S | S  | 3  |
| 58          | KfVa                            | S   | S | S   | S  | S | S | R  | S  | S | S | S | R  | 2  |
| 59          | KfVa                            | S   | S | S   | S  | S | S | R  | S  | S | S | S | R  | 2  |
| 60          | BDaEKfNvPVa                     | S   | R | S   | R  | R | S | R  | R  | R | S | S | R  | 7  |

<sup>a</sup>Tested for Ampicillin (Amp), Bacitracin (B), Cefoperazone (Cpf), Cephalothin (Kf), Clindamycin (Da), Erythromycin (E), Kanamycin(K), Novobiocin (Nv), Penicillin (P), Streptomycin (S), and Vancomycin (Va). S- sensitive, R-resistance; - No diameter formed.

Plasmid profiles: P1 P2 P2 - - P3 P4 - - P5 P3 P1 P6 - -

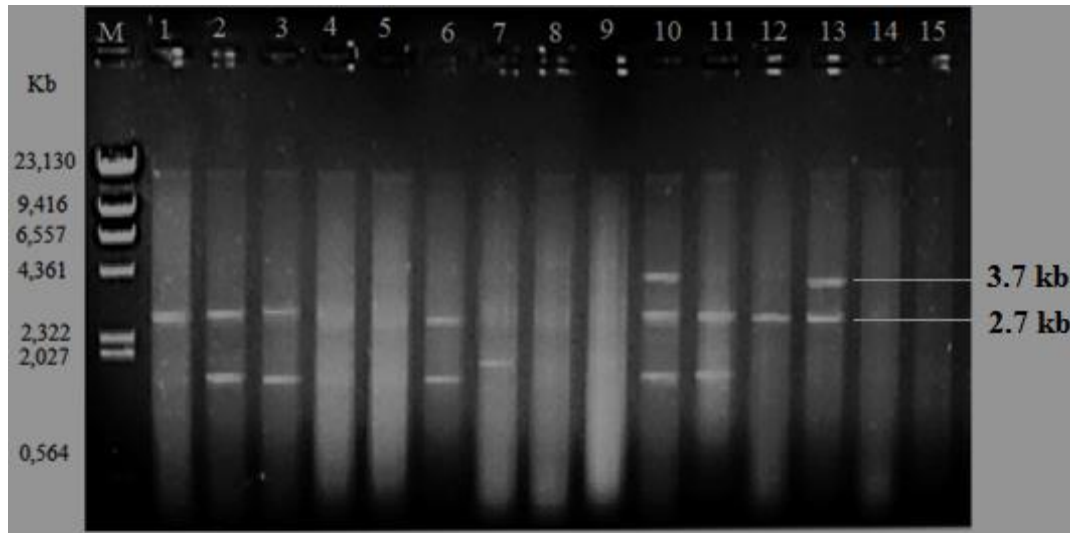

**Figure S1.** Plasmid identification using PureYield™ Plasmid Miniprep System kit (Promega, USA) on 1% (w/v) agarose gel. Lane 1: Lambda. DNA-HindIII Digest DNA ladder. Lane 1-15: Vv isolates 1-15.

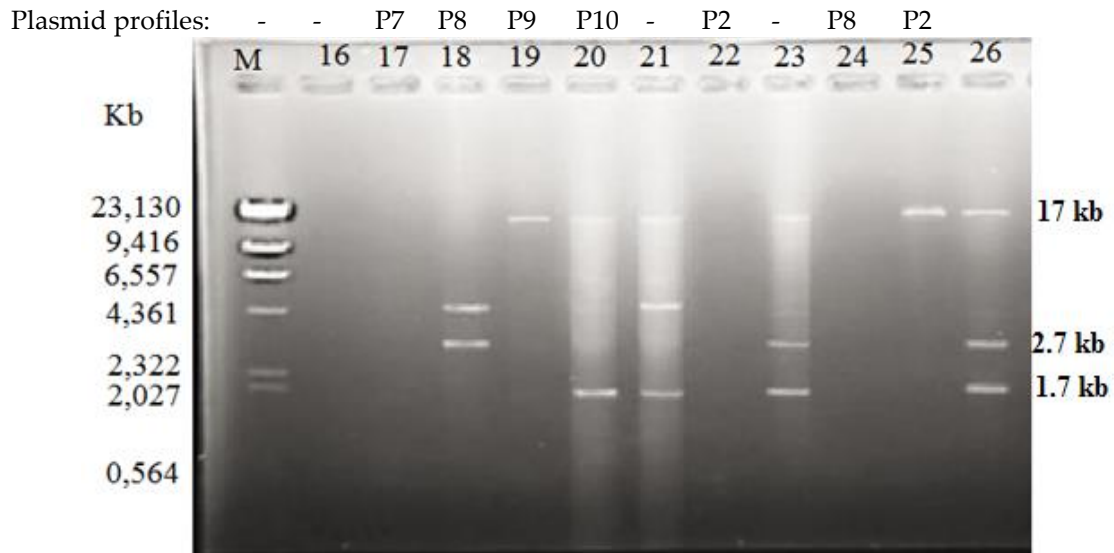

**Figure S2.** Plasmid identification using PureYield™ Plasmid Miniprep System kit (Promega, USA) on 1%(w/v) agarose gel. Lane 1: Lambda DNA-HindIII Digest DNA ladder. Lane 2-11: Vv isolates 16-26.

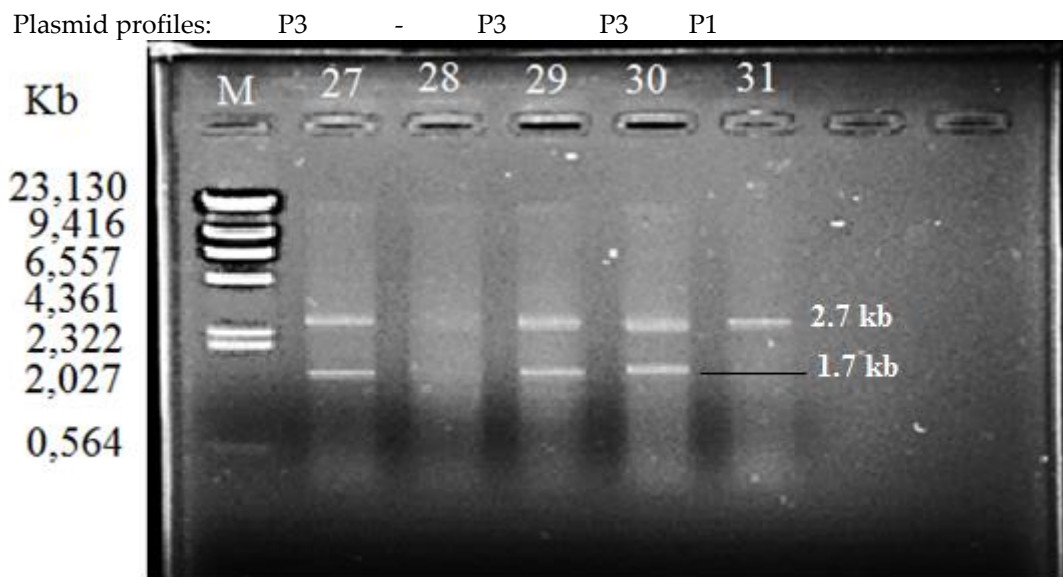

**Figure S3.** Plasmid identification using PureYield™ Plasmid Miniprep System kit (Promega, USA) on 1%(w/v) agarose gel. Lane 1: Lambda DNA-HindIII Digest DNA ladder. Lane 2- 6 Vv isolates 27-31.

Plasmid profiles: P11 P3 P3 - - P7 P12 P13 - - P14 - P3 P6 -

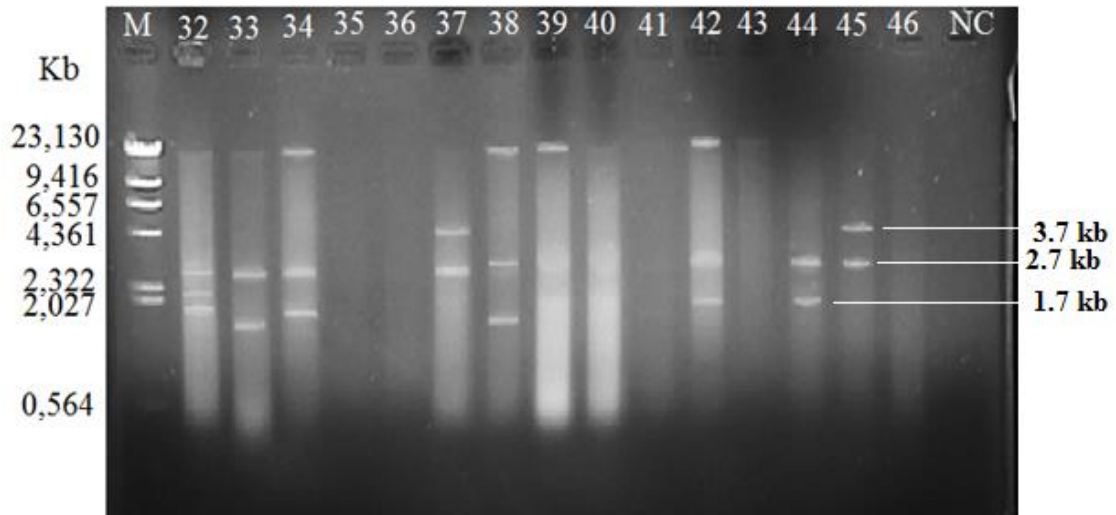

**Figure S4.** Plasmid identification using PureYield™ Plasmid Miniprep System kit (Promega, USA) on 1%(w/v) agarose gel. Lane 1: Lambda DNA-HindIII Digest DNA ladder. Lane 2-15: Vv isolates from 32 to 46 and lane 16: negative control.

Plasmid profiles: - P15 - - P16 P17 P18 P16 - P17 P18 - P19 P15

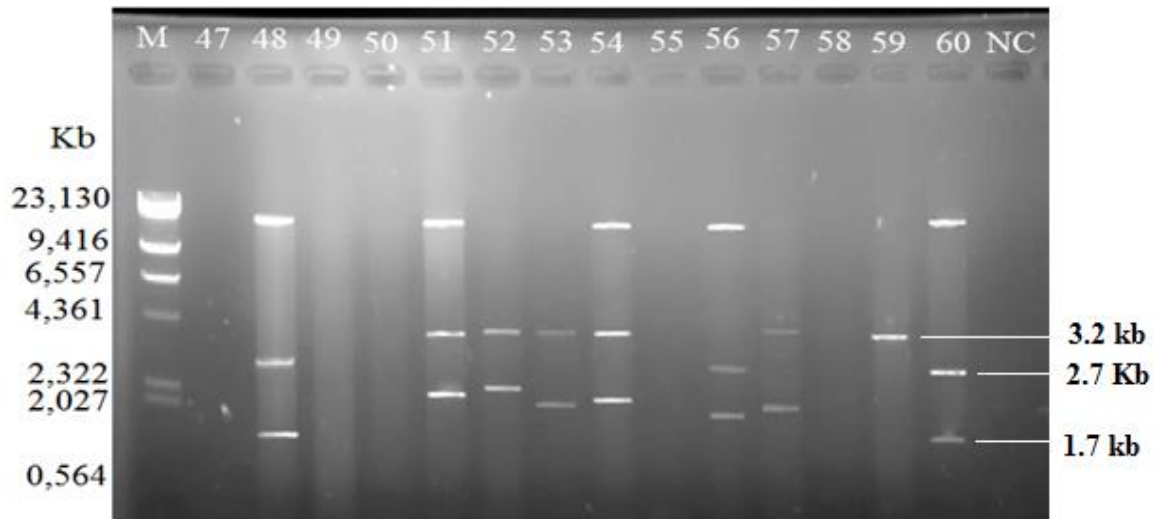

**Figure S5.** Plasmid identification using PureYield™ Plasmid Miniprep Systemkit (Promega, USA) on 1%(w/v) agarose gel. Lane M: Lambda DNA-HindIII Digest DNA ladder. Lane 2-15: Vv isolates from 47 to 60 and lane 16 NC: negative control.
